# Supplementary material
Source: HighWire-hosted journal article supplement (https://www.annfammed.org/highwire/filestream/8248/field_highwire_adjunct_files/0/Licciardone_Supp_Fig.pdf)
Supplement: Licciardone_Supp_Fig.pdf [file Licciardone_Supp_Fig.pdf]

## Online Supplementary Material

Licciardone JC, Minotti DE, Gatchel RJ, Kearns CM, Singh KP. Osteopathic manual treatment and ultrasound therapy for chronic low back pain: a randomized controlled trial. *Ann Fam Med*. 2013;11(2):122-129.

<http://www.annfammed.org/content/11/2/122>

### Supplemental Figure 1. Patient flow diagram.

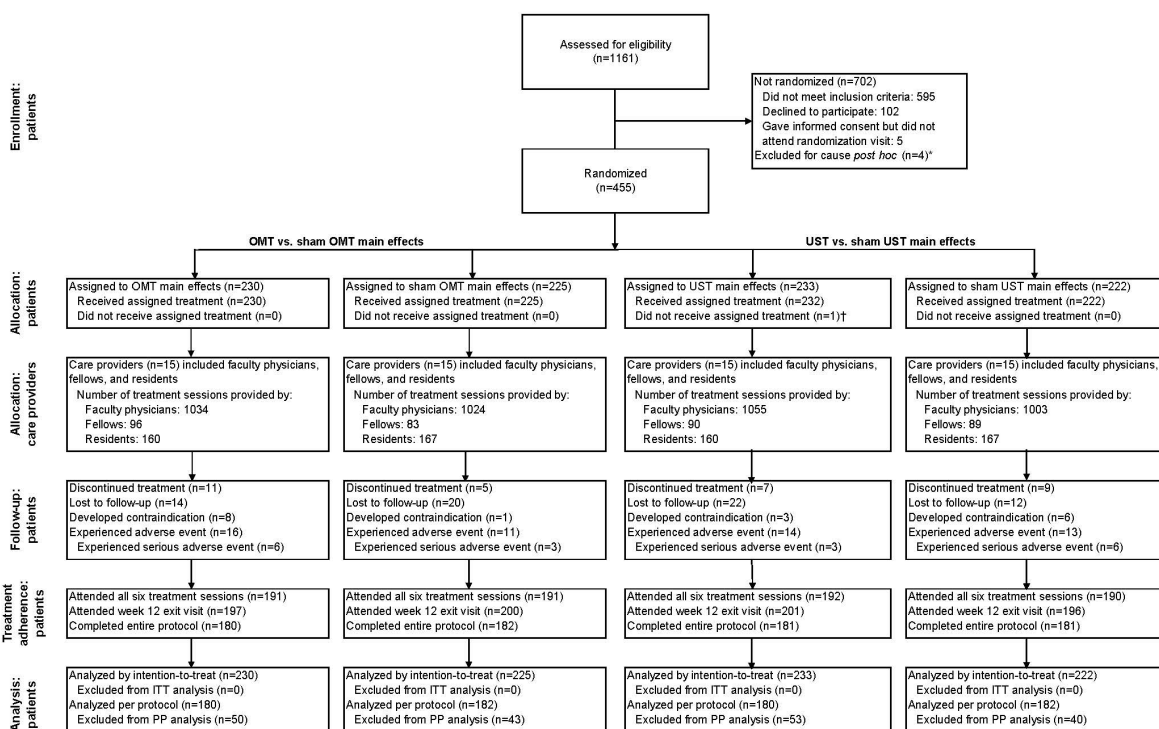

ITT = intent-to-treat; OMT = osteopathic manual treatment, PP = per-protocol; UST = ultrasound therapy.

\* Four patients were excluded for cause *post hoc* because it was subsequently discovered they did not meet the inclusion criteria. Two of these patients provided false information to initially qualify for the study.

† One patient was assigned to the sham OMT + UST treatment group, but received sham OMT + sham UST throughout the study.
